# Supplementary material for: Lubricin (PRG-4) anti-fouling coating for surface-enhanced Raman spectroscopy biosensing: towards a hierarchical separation system for analysis of biofluids
Source: Royal Society of Chemistry journal article supplement (doi:10.1039/d3an00910f), 2023-11-07
Supplement: d3an00910f1.pdf [file d3an00910f1.pdf]

# Lubricin (PRG-4) anti-fouling coating for surface-enhanced Raman spectroscopy biosensing: Towards a hierarchical separation system for analysis of biofluids

Mingyu Han,<sup>a,c,g</sup> Saimon M. Silva,<sup>b,c,d</sup> Matthew J. Russo,<sup>a</sup> Pauline E. Desroches,<sup>a</sup> Weiwei Lei,<sup>a</sup> Anita F. Quigley,<sup>c,e</sup> Robert M. I. Kapsa,<sup>c,e</sup> Simon E. Moulton,<sup>b,c,d</sup> Paul R. Stoddart,<sup>f,\*</sup> George W. Greene,<sup>a,\*</sup>

<sup>a</sup> Institute for Frontier Materials, Deakin University, Warun Ponds, Victoria 3216, Australia.

<sup>b</sup> ARC Centre of Excellence for Electromaterials Science, School of Science, Computing and Engineering Technologies, Swinburne University of Technology, Hawthorn, Victoria 3122, Australia.

<sup>c</sup> The Aikenhead Centre for Medical Discovery, St Vincent's Hospital Melbourne, Fitzroy, Victoria 3065, Australia.

<sup>d</sup> Iverson Health Innovation Research Institute, Swinburne University of Technology, Hawthorn, Victoria 3122, Australia.

<sup>e</sup> School of Electrical and Biomedical Engineering, RMIT University, Melbourne, Victoria 3001, Australia.

<sup>f</sup> School of Science, Computing and Engineering Technologies, Swinburne University of Technology, Hawthorn, Victoria 3122, Australia.

<sup>g</sup> Commonwealth Scientific and Industrial Research Organization (CSIRO), Agriculture and Food, 671 Sneydes Road, Werribee, Victoria, 3030, Australia.

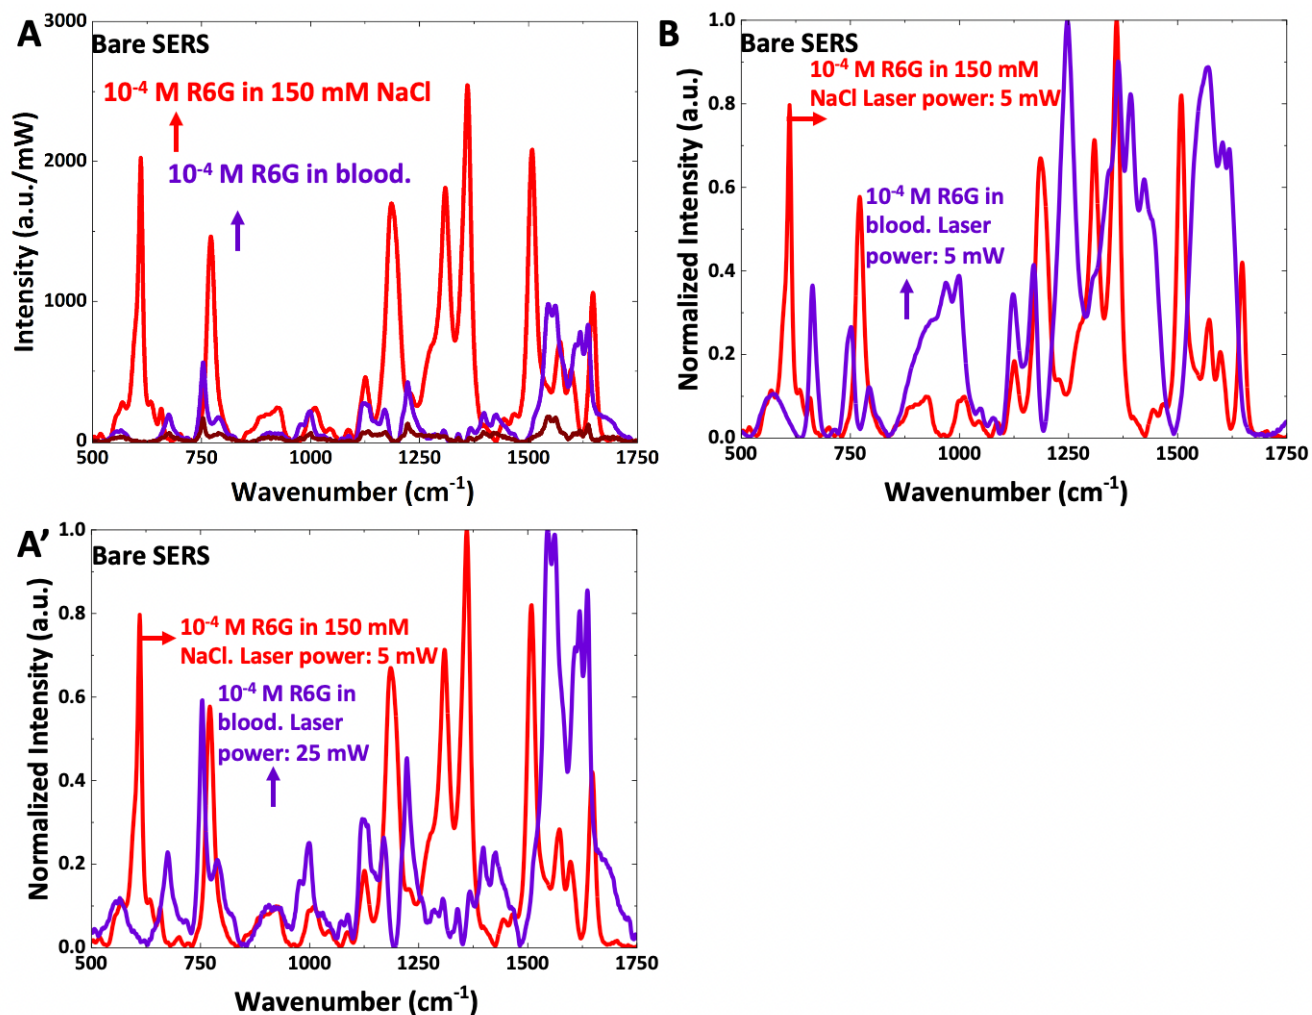

Figure S1. (A) Raman spectra of bare SERS in R6G spiked in 150 mM NaCl (red), and bare SERS in R6G spiked in blood (Purple). The peaks intensities are normalized against laser power. All Raman spectra was collected using the same helium-neon laser (633 nm), the integration time was 30s, and the laser power for R6G on AuNPs was 25 mW for bare SERS in R6G spiked in blood. (A') Normalized Raman spectra of bare SERS in R6G spiked in 150 mM NaCl (red), and bare SERS in R6G spiked in blood (Purple), plotted in (A), respectively. (B) Normalized Raman spectra of bare SERS in R6G spiked in 150 mM NaCl (red), and bare SERS in R6G spiked in blood (Purple) plotted in Fig. 3B, respectively.

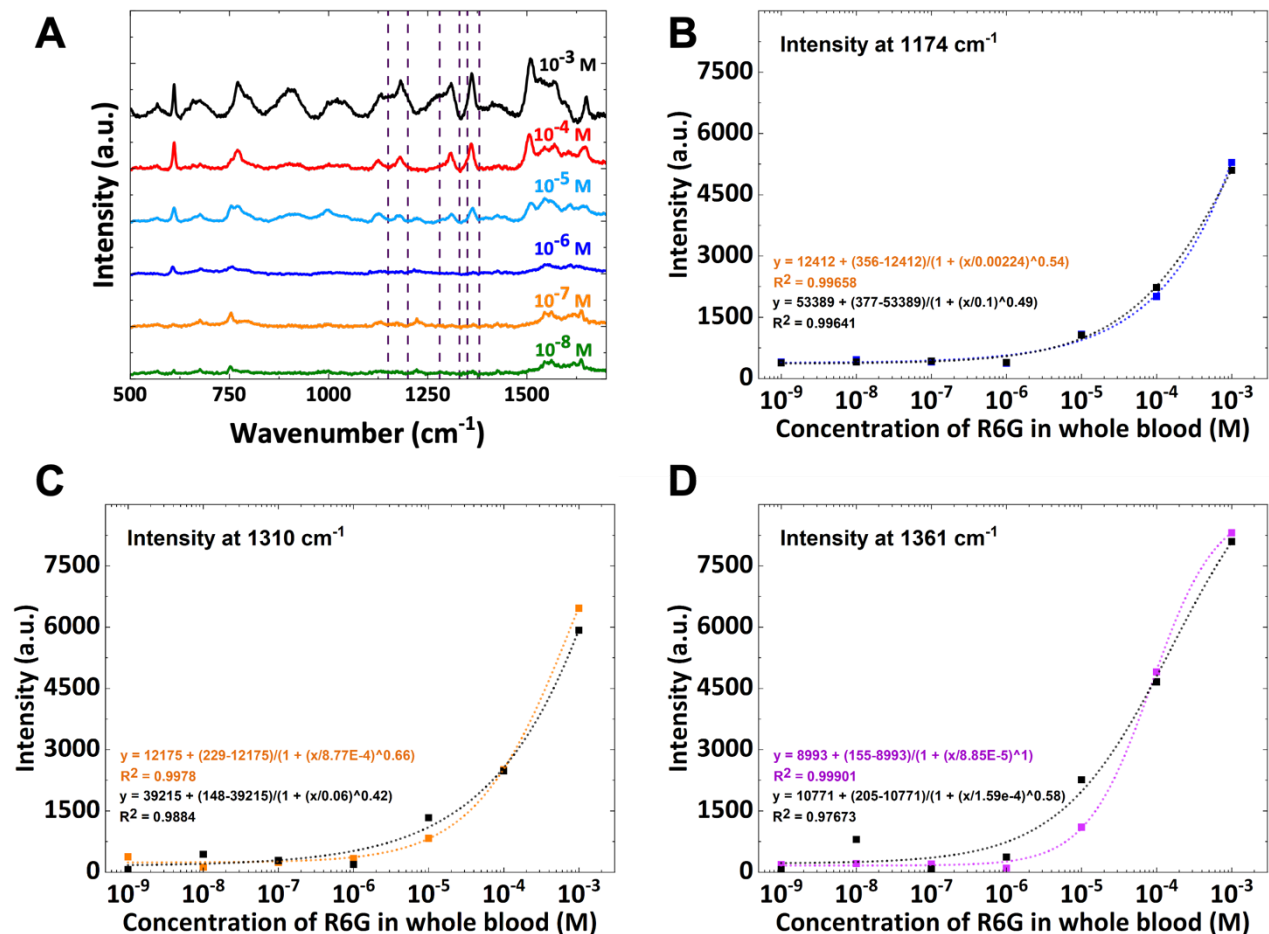

Figure S2. (A) Raman spectra of R6G spiked in unprocessed whole blood on LUB-AuNPs surface at concentration ranging from  $10^{-3}$  M to  $10^{-8}$  M. (B-D) R6G detection curve generated by plotting the intensity of the peak at  $1174 \text{ cm}^{-1}$ ,  $1310 \text{ cm}^{-1}$ , and  $1361 \text{ cm}^{-1}$  as a function of the R6G concentration, respectively. For each intensity, the two independent SERS measurements were conducted on the different areas of the same sample. All Raman spectra was collected using the same helium-neon laser ( $633 \text{ nm}$ ), the integration time was 30s, and the laser power was 25 mW.
